# Supplementary material for: A novel methodology for assessing the hygroscopicity of aerosol filter samples
Source: Copernicus journal article supplement (doi:10.5194/amt-18-603-2025), 2025-02-03
Supplement: Supplementary file 1 [file amt-18-603-2025-supplement.pdf]

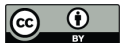

*Supplement of*

## **A novel methodology for assessing the hygroscopicity of aerosol filter samples**

**Nagendra Raparathi et al.**

*Correspondence to:* Ann M. Dillner ([amdillner@ucdavis.edu](mailto:amdillner@ucdavis.edu))

The copyright of individual parts of the supplement might differ from the article licence.

1 **Table S1.** Air density and mass obtained for room and measured relative humidities (RHs) from  
 2 Psychrometric Chart

|                                        | 1st Day                                                            | 2nd day | 3rd day | 4th day | 5th day |
|----------------------------------------|--------------------------------------------------------------------|---------|---------|---------|---------|
| T (°C) - <i>Observed</i>               | 20.5                                                               | 21.2    | 20.3    | 19.7    | 19.5    |
| RH (%) - <i>Observed</i>               | 41.4                                                               | 63.9    | 52.4    | 37.2    | 49.8    |
| P (mm Hg) - <i>Observed</i>            | 767.6                                                              | 764.3   | 762.5   | 767.8   | 764.5   |
| <i>From Online Psychrometric Chart</i> | <b>Specific volume (m<sup>3</sup>/kg)</b>                          |         |         |         |         |
| Room                                   | 0.832                                                              | 0.843   | 0.839   | 0.828   | 0.833   |
| 84.3%                                  | 0.840                                                              | 0.847   | 0.845   | 0.837   | 0.840   |
| 90.8%                                  | 0.842                                                              | 0.848   | 0.847   | 0.838   | 0.841   |
| 97.5%                                  | 0.843                                                              | 0.850   | 0.848   | 0.840   | 0.842   |
| <i>Inverse of specific volume</i>      | <b>Air density (kg/m<sup>3</sup>)</b>                              |         |         |         |         |
| Room                                   | 1.202                                                              | 1.186   | 1.192   | 1.207   | 1.200   |
| 84.3%                                  | 1.190                                                              | 1.181   | 1.183   | 1.195   | 1.190   |
| 90.8%                                  | 1.188                                                              | 1.179   | 1.181   | 1.193   | 1.189   |
| 97.5%                                  | 1.186                                                              | 1.176   | 1.179   | 1.190   | 1.188   |
| <i>Mass (in µg)</i>                    | <b>Change in the mass (µg) of air from measured RHs to room RH</b> |         |         |         |         |
|                                        | 1st Day                                                            | 2nd day | 3rd day | 4th day | 5th day |
| 84.3%                                  | 233                                                                | 114     | 172     | 264     | 204     |
| 90.8%                                  | 245                                                                | 120     | 193     | 247     | 196     |
| 97.5%                                  | 293                                                                | 183     | 237     | 323     | 240     |

3

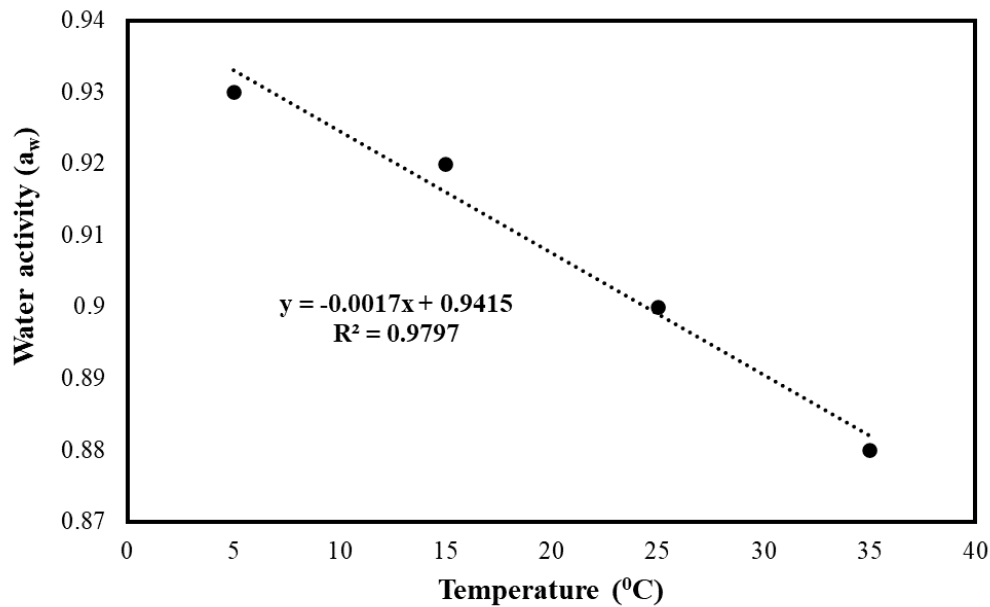

4  
 5 **Figure S1.** Water activity of saturate BaCl<sub>2</sub>.2H<sub>2</sub>O at different temperatures (Source: Wang et al.,  
 6 2013)

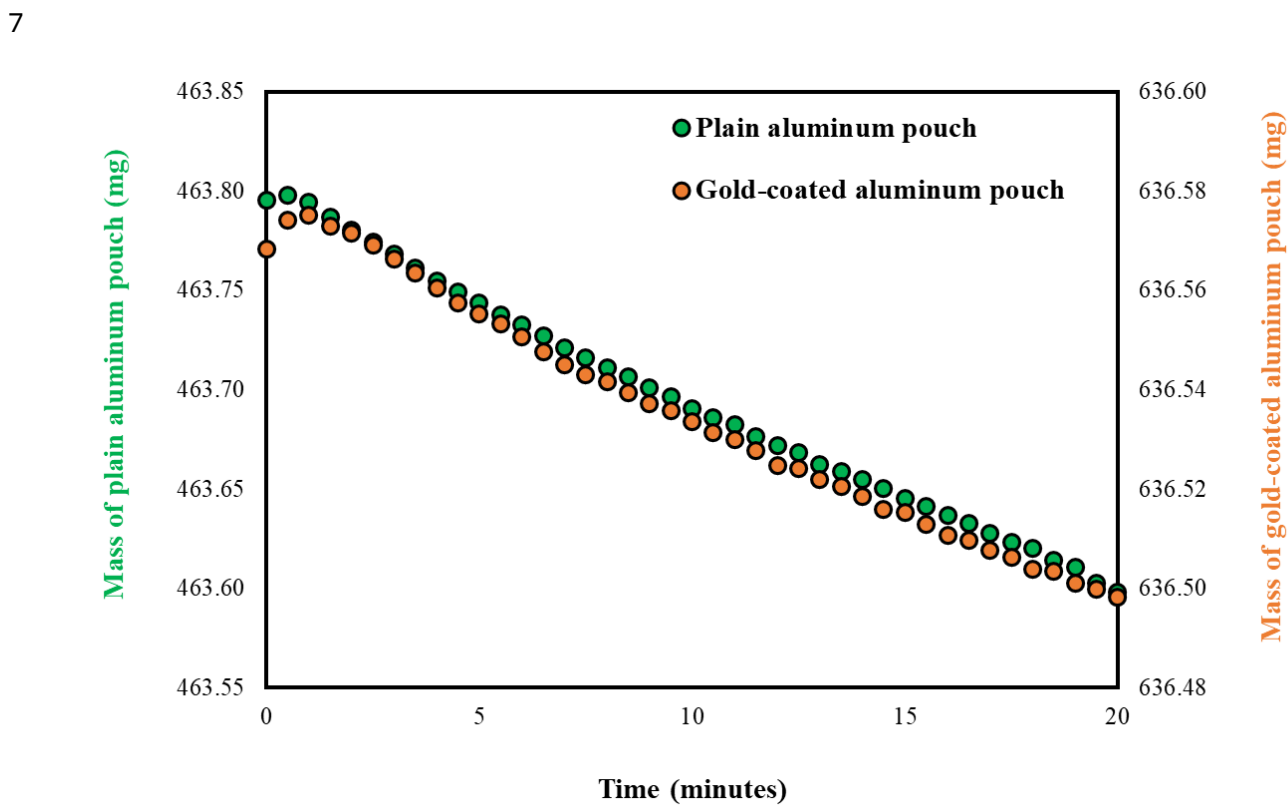

8  
 9 **Figure S2.** Comparison of the variation in wet weight of plain and gold-coated aluminum  
 10 pouches with loaded filters

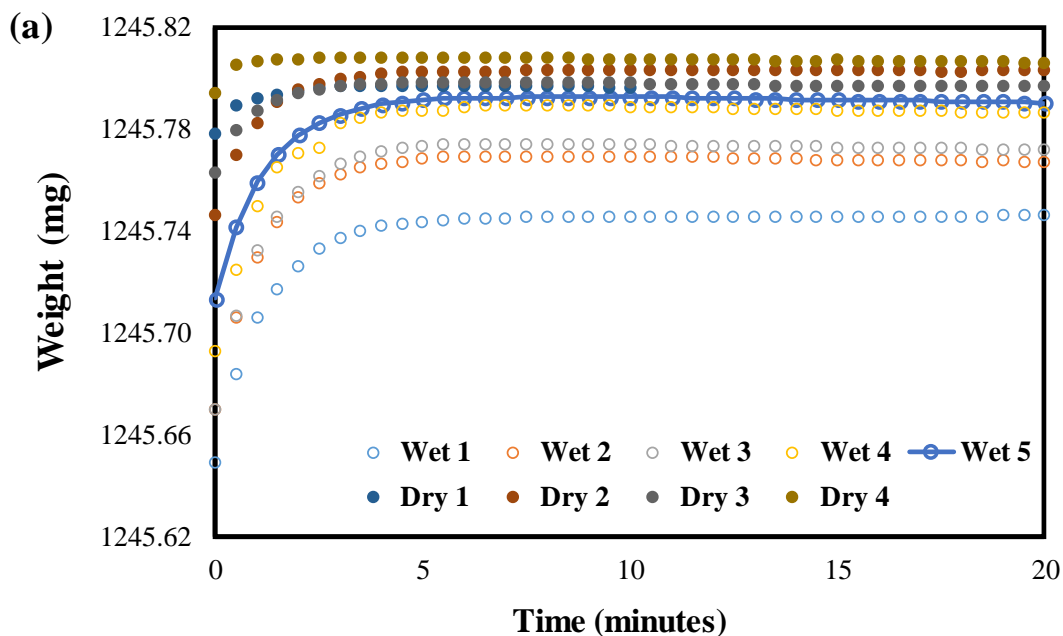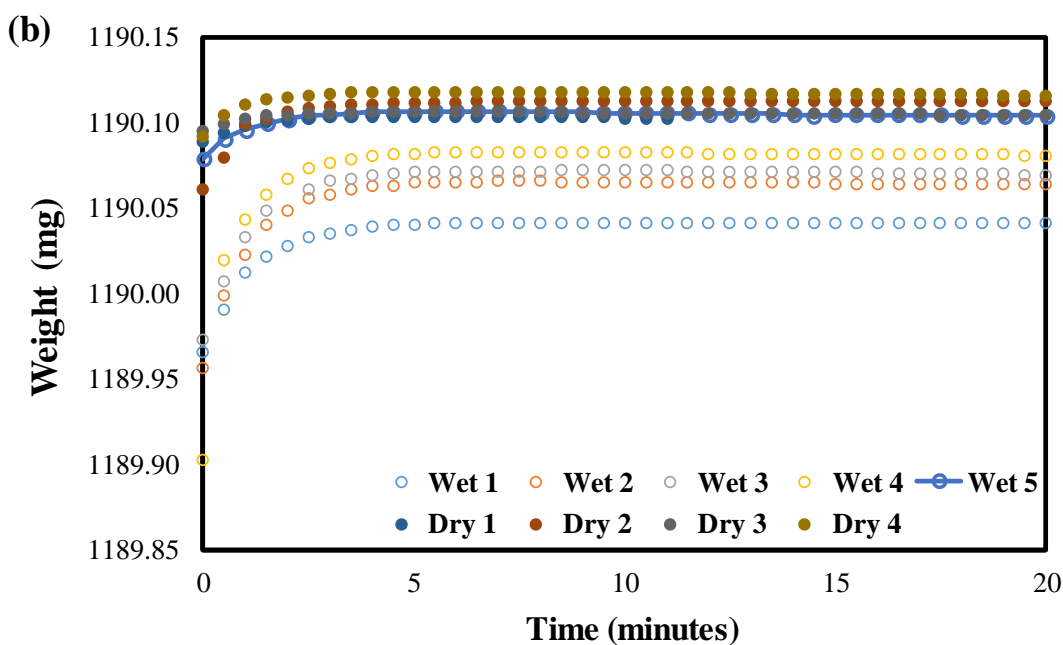

11  
 12 **Figure S3.** Variation in the weight of the plain aluminum pouch with a Teflon filter (a) 84.3%  
 13 and (b) 90.5% over time starting when the pouch is removed from the respective chamber and  
 14 placed on the balance. Hollow circles represent the transfer from the wet chamber to the balance,  
 15 while solid circles depict the transfer from the dry desiccator to the balance

16  
 17

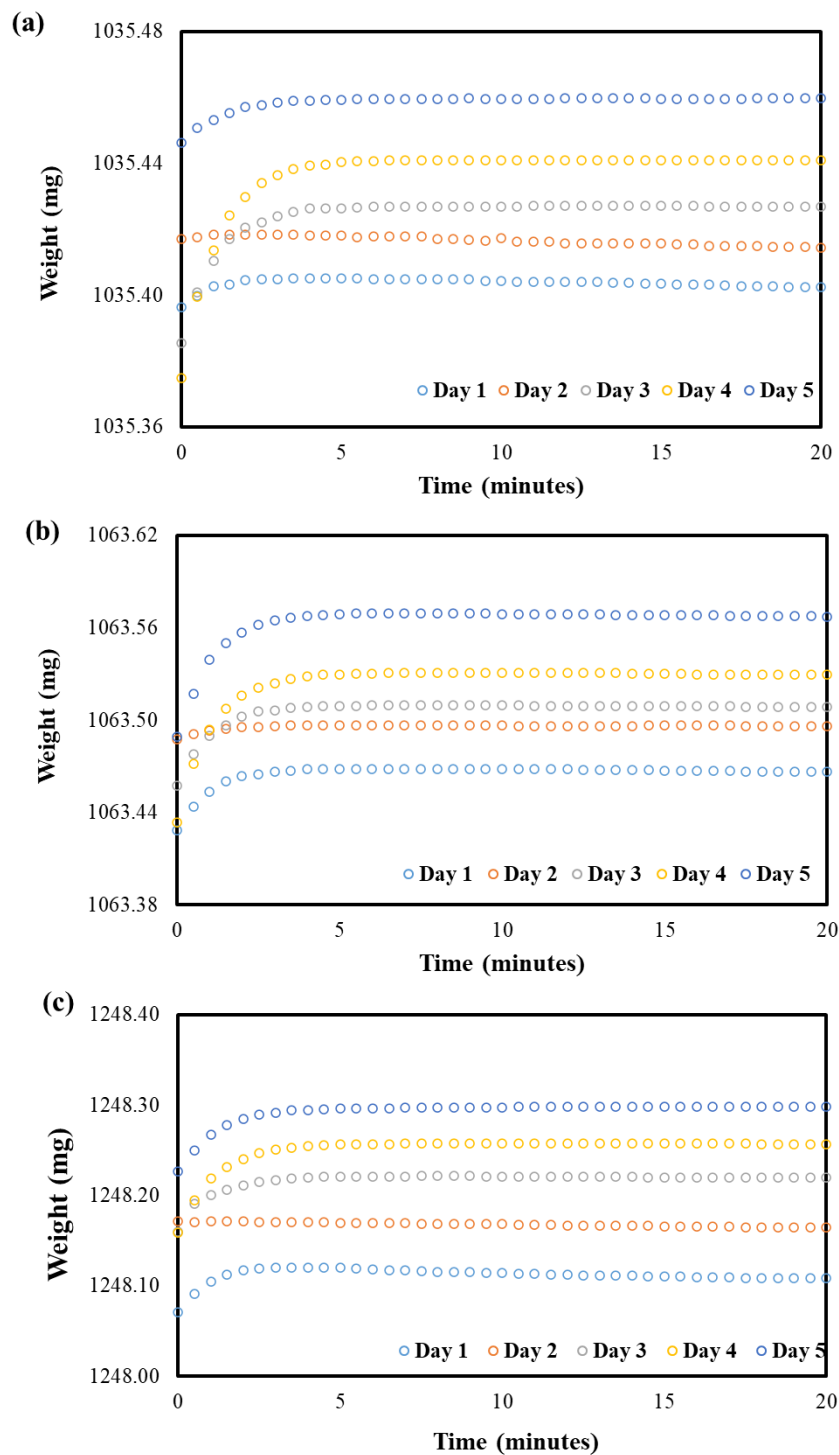

18

19 **Figure S4.** Variation in the wet weight of the plain aluminum pouch without a Teflon filter (a)  
 20 84.3%, (b) 90.8% and (c) 97.5% over time starting when the pouch is removed from the  
 21 respective chamber and placed on the balance.

22

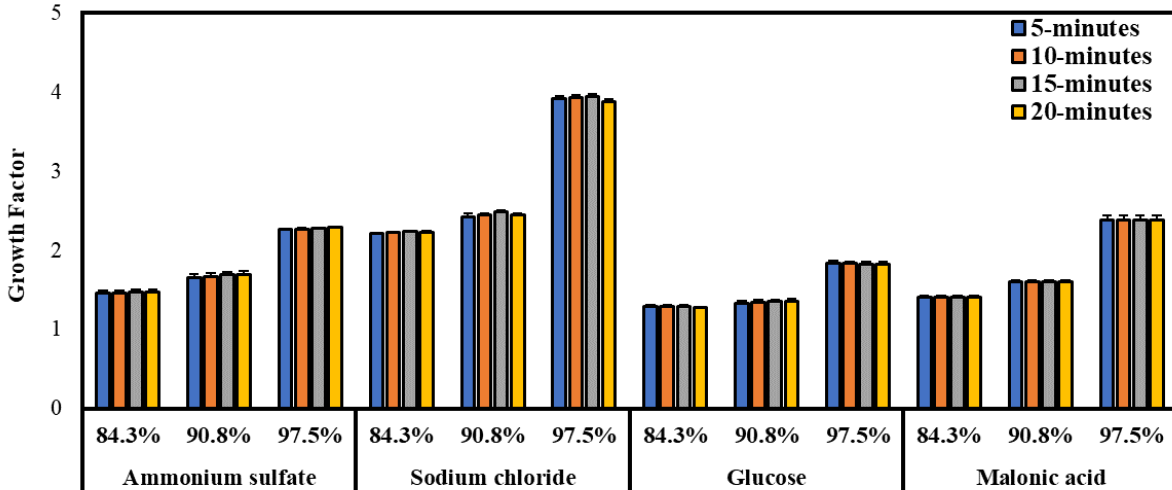

23

24 **Figure S5.** Comparison of estimated GFs from the 20 minutes wet weighing interval with the 5,  
 25 10, and 15-minute intervals. Error bar represents the standard deviation.

26

27 **S1. Estimation of Growth Factor Uncertainty**

28 The growth factor (GF) was calculated using Equations S1 through S4:

29 
$$GF = \frac{D_{wet}}{D_{dry}} \quad (S1)$$

30 
$$GF = \frac{(V_{solute} + V_{water})^{\frac{1}{3}}}{(V_{solute})^{\frac{1}{3}}} \quad (S2)$$

31 
$$GF = \frac{\left(\frac{m_{dry}}{\rho_{solute}} + \frac{m_{water}}{\rho_{solute}}\right)^{\frac{1}{3}}}{\left(\frac{m_{dry}}{\rho_{solute}}\right)^{\frac{1}{3}}} \quad (S3)$$

32 
$$GF = \frac{\left(\frac{(DS-DB)}{\rho_{solute}} + \frac{((WSP-DSP)-(WBP-DBP))}{\rho_{water}}\right)^{\frac{1}{3}}}{\left(\frac{(DS-DB)}{\rho_{solute}}\right)^{\frac{1}{3}}} \quad (S4)$$

33 The total uncertainty in the growth factor ( $\delta(GF)$ ) can be determined using uncertainty  
 34 propagation, as shown in Eq. S5:

35  $\delta(\text{GF}) =$   
36  $\sqrt{\left(\frac{\partial(\text{GF})}{\partial \text{DS}} \cdot \sigma(\text{DS})\right)^2 + \left(\frac{\partial(\text{GF})}{\partial \text{DB}} \cdot \sigma(\text{DB})\right)^2 + \left(\frac{\partial(\text{GF})}{\partial \text{WSP}} \cdot \sigma(\text{WSP})\right)^2 + \left(\frac{\partial(\text{GF})}{\partial \text{DSP}} \cdot \sigma(\text{DSP})\right)^2 + \left(\frac{\partial(\text{GF})}{\partial \text{WBP}} \cdot \sigma(\text{WBP})\right)^2 + \left(\frac{\partial(\text{GF})}{\partial \text{DBP}} \cdot \sigma(\text{DBP})\right)^2}$   
37  
38 (S5)

39 where, wet sample with pouch (WSP) is the mass of the pouch and sampled filter at high RH, dry  
40 sample with pouch (DSP) is the mass of the pouch with particles on the filter at dry conditions,  
41 wet blank with pouch (WBP) is the mass of the pouch with blank filter at high RH, dry blank with  
42 pouch (DBP) is the mass of the pouch with blank filter at dry conditions, dry sample (DS) is the  
43 mass of the filter with particles on the filter at dry condition, and dry blank (DB) is the mass of the  
44 blank filter.  $mass_{solute}$  and  $mass_{water}$  are the mass of dry solute and water, respectively.  $\rho_{solute}$   
45 and  $\rho_{water}$  denote the densities of dry solute and water, respectively.
